# Supplementary material for: Aspartate-β-Hydroxylase: A Promising Target to Limit the Local Invasiveness of Colorectal Cancer
Source: PubMed Central journal article supplement (PMC7226058; doi:10.3390/cancers12040971), 2020-04-14
Supplement: cancers-12-00971-s001.pdf [file cancers-12-00971-s001.pdf]

# Aspartate- $\beta$ -Hydroxylase: A Promising Target to Limit the Local Invasiveness of Colorectal Cancer

Roberto Benelli, Delfina Costa, Luca Mastracci, Federica Grillo, Mark Jon Olsen, Paola Barboro, Alessandro Poggi and Nicoletta Ferrari

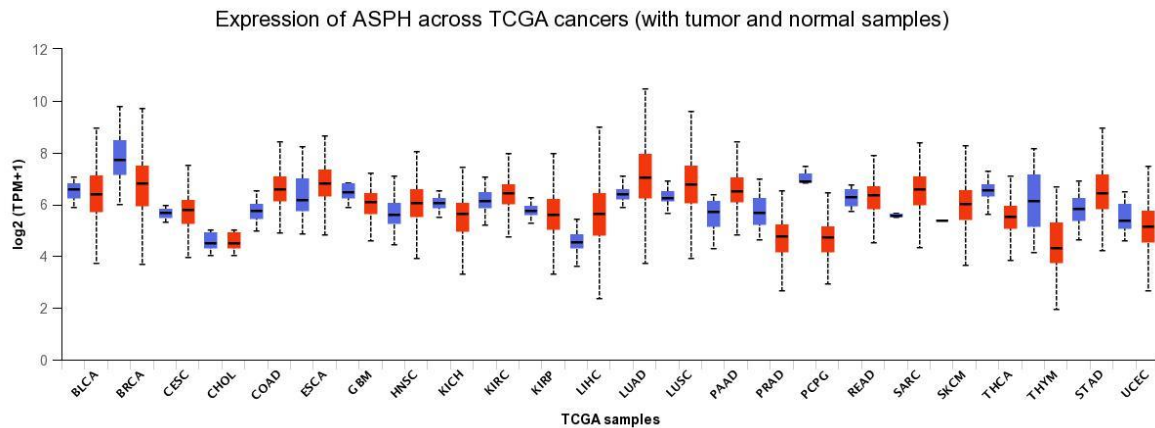

**Figure S1.** ASPH mRNA levels in the normal tissue (blue) and the related cancer (red) of all available TCGA samples (analysis by UALCAN website). Samples with a highly statistically significant increase of ASPH mRNA levels in tumor tissue ( $p < 0.0001$ ) are highlighted in bold in the list below. The number of normal and tumor samples available for comparison is indicated (vs = versus).

|             |                                               |                  |
|-------------|-----------------------------------------------|------------------|
| BLCA        | bladder urothelial carcinoma,                 | 19 vs 408        |
| BRCA        | breast invasive carcinoma,                    | 114 vs 1097      |
| CECSC       | cervical squamous cell carcinoma,             | 3 vs 305         |
| CHOL        | cholangiocarcinoma,                           | 9 vs 36          |
| <b>COAD</b> | <b>colon adenocarcinoma,</b>                  | <b>41 vs 286</b> |
| ESCA        | esophageal carcinoma,                         | 11 vs 184        |
| GBM         | glioblastoma multiforme,                      | 5 vs 156         |
| <b>HNSC</b> | <b>head and neck squamous cell carcinoma,</b> | <b>44 vs 520</b> |
| KICH        | kidney chromofobe,                            | 25 vs 67         |
| KIRC        | kidney clear cell carcinoma,                  | 72 vs 533        |
| KIRP        | kidney papillary cell carcinoma,              | 32 vs 290        |
| <b>LIHC</b> | <b>liver hepatocellular carcinoma,</b>        | <b>50 vs 371</b> |
| <b>LUAD</b> | <b>lung adenocarcinoma,</b>                   | <b>59 vs 515</b> |
| <b>LUSC</b> | <b>lung squamous cell carcinoma,</b>          | <b>52 vs 503</b> |
| PAAD        | pancreatic adenocarcinoma,                    | 4 vs 178         |
| PRAD        | prostate adenocarcinoma,                      | 52 vs 497        |
| PCPG        | pheochromocytoma and paraganglioma,           | 3 vs 179         |
| READ        | rectal adenocarcinoma,                        | 10 vs 166        |
| SARC        | sarcoma,                                      | 2 vs 260         |
| SKCM        | skin cutaneous melanoma,                      | 1 vs 472         |
| THCA        | thyroid carcinoma,                            | 59 vs 505        |
| THYM        | thymoma,                                      | 2 vs 120         |
| <b>STAD</b> | <b>stomach adenocarcinoma,</b>                | <b>34 vs 415</b> |
| UCEC        | uterine corpus endometrial carcinoma,         | 35 vs 546        |

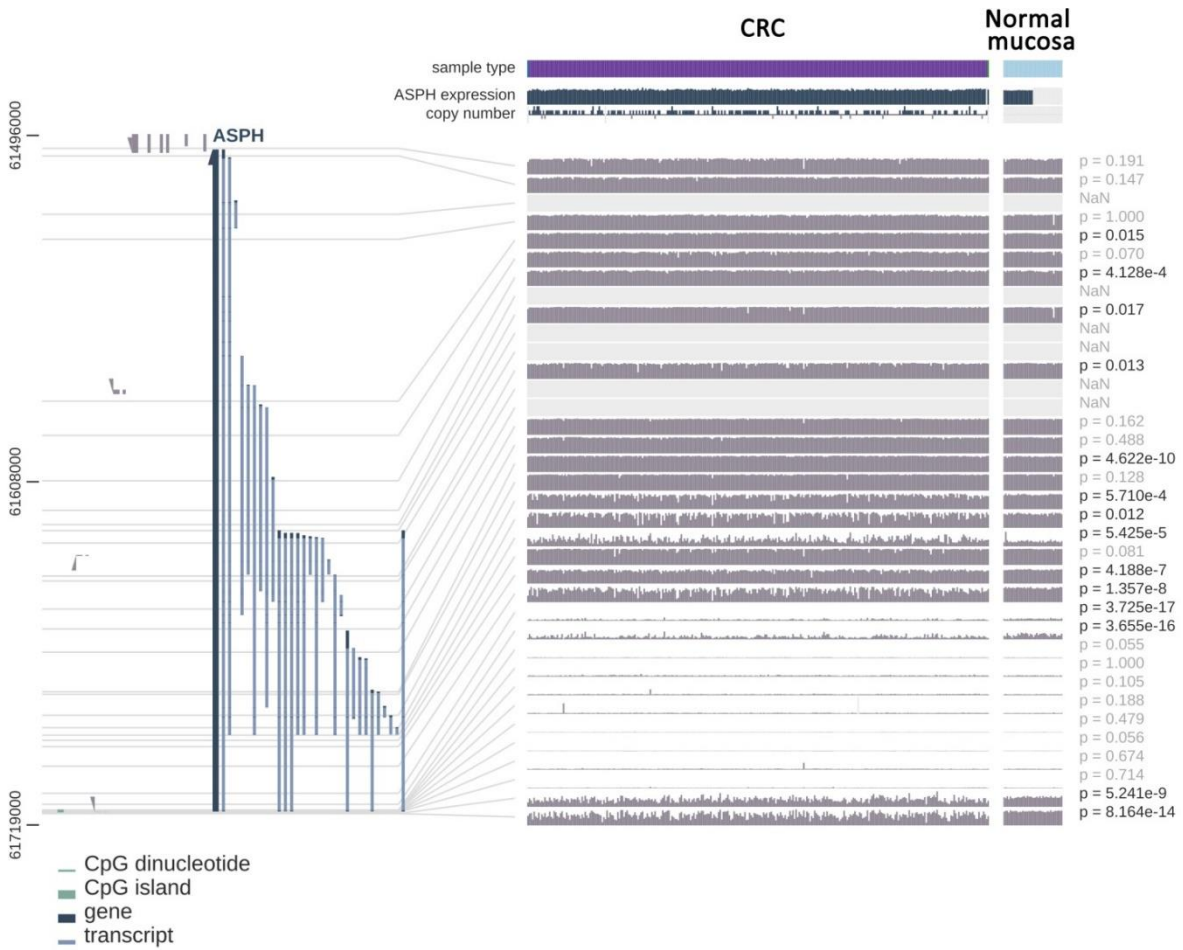

**Figure S2.** Comparison of the methylation status of each region of ASPH gene in CRC and normal colon mucosa. The analysis shows that ASPH gene promoter is not the only target of a differential methylation. Methylation involves also single CpG dinucleotides probably regulating alternative splicing. CRC and normal mucosa share the same sites of methylation ( $p$  reported on the right for each putative site of methylation). Analysis performed by MEXPRESS (<https://mexpress.be>).

ASPH (chr8:62413114-62627199)

| Cancer Subset                                         | In Peak? | Nearest Peak<br>(click link to launch IGV) | #Genes<br>in Peak | Q-value | Frequency of Amplification |        |            |
|-------------------------------------------------------|----------|--------------------------------------------|-------------------|---------|----------------------------|--------|------------|
|                                                       |          |                                            |                   |         | Overall                    | Focal  | High-level |
| <a href="#">all_cancers</a>                           | No       | <a href="#">chr8:55071319-55382067</a>     | 1                 | 7.54E-5 | 0.3692                     | 0.0402 | 0.0715     |
| <a href="#">Breast invasive adenocarcinoma</a>        | Yes      | <a href="#">chr8:58428403-63980308</a>     | 19                | 1.53E-4 | 0.5231                     | 0.0778 | 0.1611     |
| <a href="#">Lung adenocarcinoma</a>                   | Yes      | <a href="#">chr8:61241324-63232864</a>     | 8                 | 0.00301 | 0.4845                     | 0.0678 | 0.0698     |
| <a href="#">Colorectal cancers</a>                    | Yes      | <a href="#">chr8:42886483-71491765</a>     | 115               | 0.0196  | 0.5398                     | 0.039  | 0.1285     |
| <a href="#">Colon adenocarcinoma</a>                  | Yes      | <a href="#">chr8:52559122-76701065</a>     | 130               | 0.158   | 0.5289                     | 0.0356 | 0.1222     |
| <a href="#">Rectum adenocarcinoma</a>                 | Yes      | <a href="#">chr8:41702356-96047933</a>     | 249               | 0.321   | 0.5697                     | 0.0485 | 0.1455     |
| <a href="#">Testicular germ cell tumors</a>           | Yes      | <a href="#">chr8:54816621-99935217</a>     | 233               | 0.52    | 0.8133                     | 0.0467 | 0.1        |
| <a href="#">Melanomas</a>                             | Yes      | <a href="#">chr8:42933372-95556884</a>     | 226               | 0.957   | 0.4955                     | 0.0291 | 0.1435     |
| <a href="#">Sarcoma</a>                               | Yes      | <a href="#">chr8:42933372-145232496</a>    | 548               | 1.0     | 0.3164                     | 0.0703 | 0.043      |
| <a href="#">Cutaneous melanoma</a>                    | Yes      | <a href="#">chr8:42701314-95556884</a>     | 230               | 1.0     | 0.4672                     | 0.0328 | 0.0956     |
| <a href="#">Epithelial cancers</a>                    | No       | <a href="#">chr8:55091227-55352528</a>     | 0                 | 3.8E-6  | 0.4153                     | 0.0455 | 0.0834     |
| <a href="#">Ovarian serous cystadenocarcinoma</a>     | No       | <a href="#">chr8:55186953-55361490</a>     | 0                 | 9.14E-4 | 0.5095                     | 0.1589 | 0.1382     |
| <a href="#">Uveal melanoma</a>                        | No       | <a href="#">chr8:66582149-95556550</a>     | 147               | 0.0111  | 0.625                      | 0.0125 | 0.3625     |
| <a href="#">Lung cancers</a>                          | No       | <a href="#">chr8:80276890-81835247</a>     | 7                 | 0.041   | 0.5034                     | 0.0659 | 0.056      |
| <a href="#">Kidney chromophobe</a>                    | No       | No peak on chromosome                      | 0                 | 0.797   | 0.2727                     | 0.0    | 0.0758     |
| <a href="#">Thymoma</a>                               | No       | No peak on chromosome                      | 0                 | 1.0     | 0.0813                     | 0.0    | 0.0081     |
| <a href="#">Adrenocortical carcinoma</a>              | No       | No peak on chromosome                      | 0                 | 1.0     | 0.4111                     | 0.0111 | 0.1889     |
| <a href="#">Mesothelioma</a>                          | No       | No peak on chromosome                      | 0                 | 1.0     | 0.1609                     | 0.0    | 0.0        |
| <a href="#">Thyroid carcinoma</a>                     | No       | No peak on chromosome                      | 0                 | 1.0     | 0.014                      | 0.0    | 0.0        |
| <a href="#">Liver hepatocellular carcinoma</a>        | No       | <a href="#">chr8:66441193-95556588</a>     | 149               | 1.0     | 0.4973                     | 0.027  | 0.1946     |
| <a href="#">Pancreatic adenocarcinoma</a>             | No       | <a href="#">chr8:40429030-40765717</a>     | 1                 | 1.0     | 0.2609                     | 0.0163 | 0.0054     |
| <a href="#">Pheochromocytoma and Paraganglioma</a>    | No       | No peak on chromosome                      | 0                 | 1.0     | 0.0802                     | 0.0062 | 0.0        |
| <a href="#">Blood cancers</a>                         | No       | <a href="#">chr8:112651697-145232496</a>   | 233               | 1.0     | 0.1255                     | 0.0042 | 0.0042     |
| <a href="#">Kidney cancers</a>                        | No       | <a href="#">chr8:95338711-145232496</a>    | 325               | 1.0     | 0.1179                     | 0.0    | 0.0102     |
| <a href="#">Glial cancers</a>                         | No       | <a href="#">chr8:127927969-131798497</a>   | 22                | 1.0     | 0.0936                     | 0.0018 | 0.0037     |
| <a href="#">Bladder urothelial carcinoma</a>          | No       | <a href="#">chr8:41492054-42099360</a>     | 7                 | 1.0     | 0.5343                     | 0.0711 | 0.0735     |
| <a href="#">Cervical squamous cell carcinoma</a>      | No       | <a href="#">chr8:40913581-42701314</a>     | 20                | 1.0     | 0.3085                     | 0.0271 | 0.0373     |
| <a href="#">Cholangiocarcinoma</a>                    | No       | No peak on chromosome                      | 0                 | 1.0     | 0.2778                     | 0.0    | 0.0278     |
| <a href="#">Diffuse large B-cell lymphoma</a>         | No       | <a href="#">chr8:126156754-145232496</a>   | 173               | 1.0     | 0.125                      | 0.0    | 0.0        |
| <a href="#">Esophageal carcinoma</a>                  | No       | <a href="#">chr8:80668048-81978492</a>     | 7                 | 1.0     | 0.5761                     | 0.0489 | 0.0761     |
| <a href="#">Glioblastoma multiforme</a>               | No       | <a href="#">chr8:127927969-131798497</a>   | 22                | 1.0     | 0.0919                     | 0.0    | 0.0035     |
| <a href="#">Head and neck squamous cell carcinoma</a> | No       | <a href="#">chr8:49270178-49935303</a>     | 4                 | 1.0     | 0.6054                     | 0.0192 | 0.067      |
| <a href="#">Kidney renal clear cell carcinoma</a>     | No       | <a href="#">chr8:111877123-145232496</a>   | 233               | 1.0     | 0.1212                     | 0.0    | 0.0038     |
| <a href="#">Kidney renal papillary cell carcinoma</a> | No       | No peak on chromosome                      | 0                 | 1.0     | 0.0764                     | 0.0    | 0.0069     |
| <a href="#">Acute myeloid leukemia</a>                | No       | No peak on chromosome                      | 0                 | 1.0     | 0.1257                     | 0.0052 | 0.0052     |
| <a href="#">Brain lower grade glioma</a>              | No       | <a href="#">chr8:113046041-138577525</a>   | 106               | 1.0     | 0.0955                     | 0.0039 | 0.0039     |
| <a href="#">Lung squamous cell carcinoma</a>          | No       | <a href="#">chr8:42284394-42424881</a>     | 2                 | 1.0     | 0.523                      | 0.0639 | 0.0419     |
| <a href="#">Prostate adenocarcinoma</a>               | No       | <a href="#">chr8:48689366-61613025</a>     | 52                | 1.0     | 0.2581                     | 0.0264 | 0.0447     |
| <a href="#">Stomach adenocarcinoma</a>                | No       | <a href="#">chr8:76288959-77659134</a>     | 4                 | 1.0     | 0.5646                     | 0.0499 | 0.0612     |
| <a href="#">Uterine corpus endometrioid carcinoma</a> | No       | <a href="#">chr8:55149374-55384213</a>     | 1                 | 1.0     | 0.321                      | 0.026  | 0.0612     |
| <a href="#">Uterine carcinosarcoma</a>                | No       | <a href="#">chr8:54410905-56627452</a>     | 9                 | 1.0     | 0.6607                     | 0.1429 | 0.3036     |

**Figure S3.** Analysis of chromosomal regions identifying clusters of genes potentially co-amplified with ASPH in human cancers. Analysis performed by the Broad Institute web platform (<http://portals.broadinstitute.org/tcga>). Please find below the list of the 115 amplified genes clustering with ASPH in the peak region, in CRC. In the red square is highlighted the small cluster of 8 genes co-amplified in lung cancer.

|                |                                                                                          |               |
|----------------|------------------------------------------------------------------------------------------|---------------|
| FNTA           | CHCHD7                                                                                   | PDE7A         |
| POMK           | SDR16C5                                                                                  | DNAJC5B       |
| HGSNAT         | SDR16C6P                                                                                 | TRIM55        |
| POTEA          | PENK                                                                                     | CRH           |
| LINC00293      | LINC00968                                                                                | LINC00967     |
| RP11-1134I14.8 | IMPAD1                                                                                   | RP11-346I3.4  |
| SPIDR          | RP11-513O17.2                                                                            | RRS1          |
| CEBPD          | RP11-513O17.3                                                                            | ADHFE1        |
| PRKDC          | LINC00588                                                                                | C8ORF46       |
| MCM4           | FAM110B                                                                                  | MYBL1         |
| UBE2V2         | LOC101929528                                                                             | VCPPI1        |
| RP11-770E5.1   | UBXN2B                                                                                   | C8ORF44       |
| LOC101929217   | CYP7A1                                                                                   | C8ORF44-SGK3  |
| EFCAB1         | SDCBP                                                                                    | SGK3          |
| SNAI2          | NSMAF                                                                                    | PTTG3P        |
| C8ORF22        | TOX                                                                                      | MCMDC2        |
| SNTG1          | CA8                                                                                      | SNHG6         |
| PXDNL          | RP11-163N6.2                                                                             | SNORD87       |
| PCMTD1         | RAB2A                                                                                    | TCF24         |
| ST18           | CHD7                                                                                     | PPP1R42       |
| FAM150A        | LOC100130298                                                                             | COPS5         |
| RB1CC1         | CLVS1                                                                                    | CSPP1         |
| NPBWR1         | ASPH  | ARFGEF1       |
| OPRK1          | MIR4470                                                                                  | CPA6          |
| ATP6V1H        | NKAIN3                                                                                   | PREX2         |
| RGS20          | UG0898H09                                                                                | LOC286189     |
| TCEA1          | GGH                                                                                      | C8ORF34       |
| LYPLA1         | TTPA                                                                                     | RP11-600K15.1 |
| MRPL15         | YTHDF3-AS1                                                                               | RP11-744J10.3 |
| SOX17          | YTHDF3                                                                                   | SULF1         |
| RP1            | RP11-579E24.1                                                                            | SLCO5A1       |
| XKR4           | LINC00966                                                                                | PRDM14        |
| SBF1P1         | MIR124-2                                                                                 | NCOA2         |
| TMEM68         | LOC401463                                                                                | RP11-333A23.4 |
| TGS1           | BHLHE22                                                                                  | TRAM1         |
| LYN            | CYP7B1                                                                                   |               |
| RPS20          | LINC00251                                                                                |               |
| SNORD54        | LOC286186                                                                                |               |
| MOS            | ARMC1                                                                                    |               |
| PLAG1          | MTRF1                                                                                    |               |

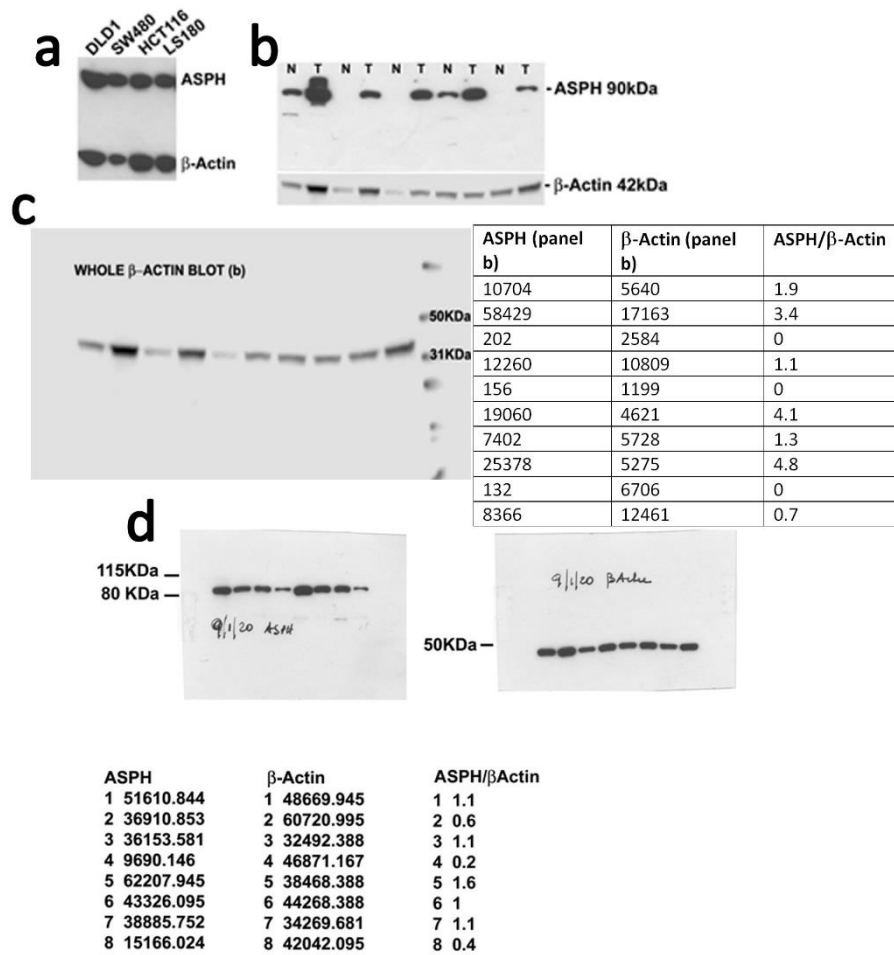

**Figure S4.** ASPH antibody characterization: (a) Western blot analysis of ASPH expression in lysates from CRC cell lines (whole blot for both ASPH and beta-actin proteins is shown); (b) Western blot analysis of ASPH expression in tissue samples (whole blot is shown for ASPH protein). N, normal tissue; T, tumor tissue. Long exposures reveal a unique band corresponding to the active high molecular weight form (86kDa) of ASPH. (c) Whole blot of beta actin and table with densitometric values of ASPH, and their ratio with  $\beta$ -actin, reported in order of appearance; (d) Full size images of blots shown in figure 4 and their densitometric quantification. Quantifications are shown in order of appearance.



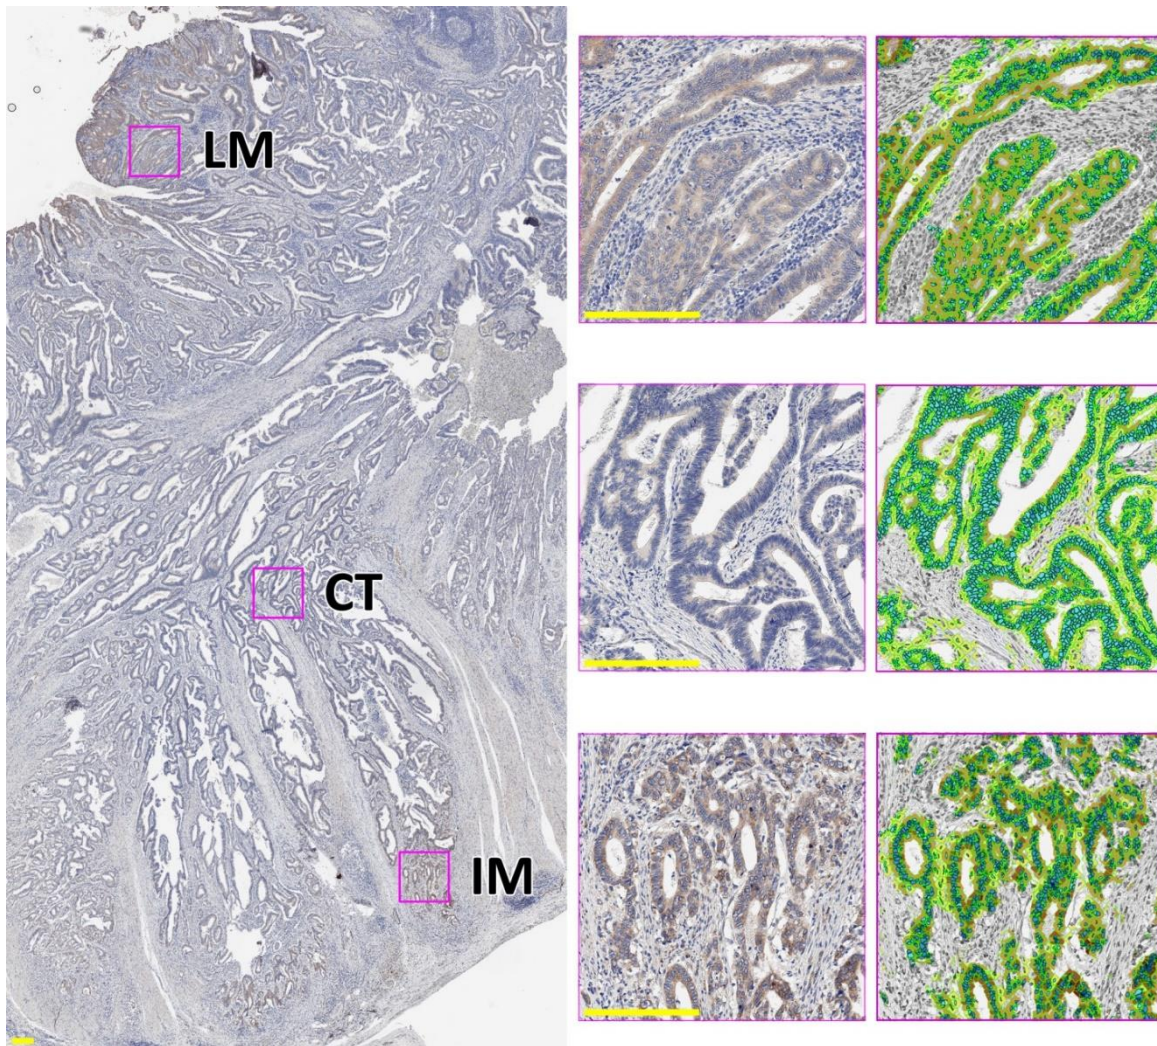

**Figure S5.** Example of digital pathology analysis of the luminal area (LM), central tumor (CT) and invasive margin (IM) of a CRC specimen, stained by anti ASPH antibody. Annotated regions of interest (ROI) are shown in pink squares. The recognition of tumor cells and the resultant H-score quantification of ASPH was obtained combining a trained Genie algorithm with a modified Cytoplasmic v2 macro of the Image Scope software. Scale bar: 200  $\mu\text{m}$ .



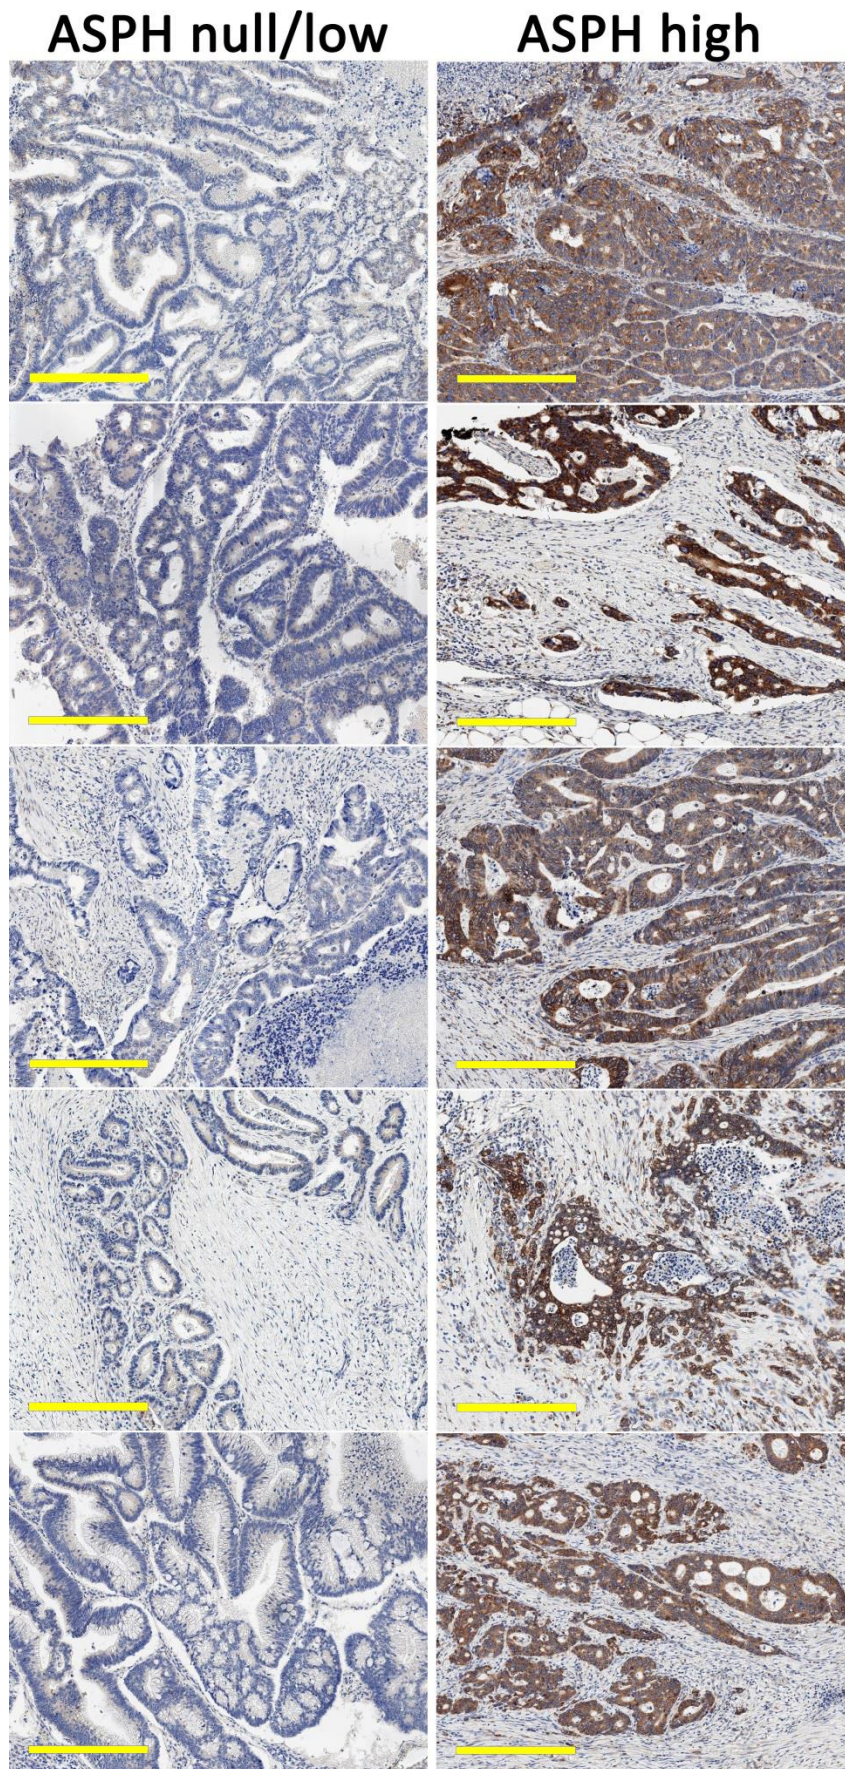

**Figure S6.** Examples of CRC samples with null/low (left), or high (right) ASPH expression. Scale bar: 300 μm.



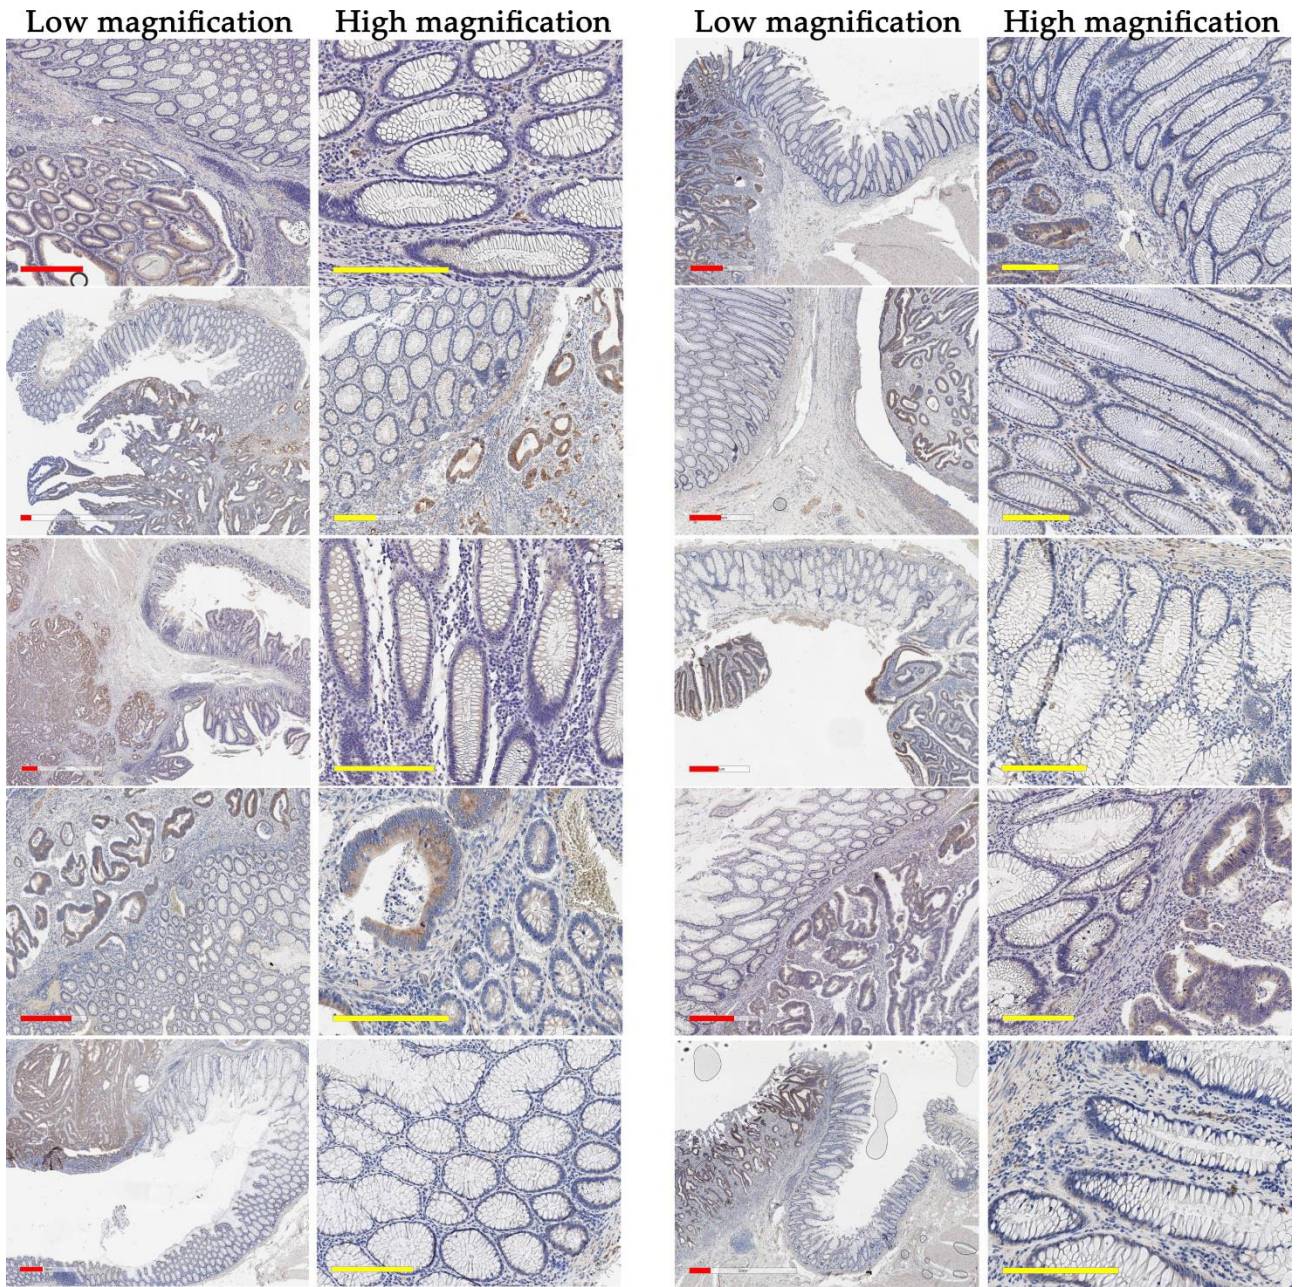

**Figure S7.** Normal and hyperplastic mucosa is negative, or faintly stained for ASPH, as compared to the adjacent CRC. Red scale bar: 400  $\mu\text{m}$ ; yellow scale bar: 200  $\mu\text{m}$ .



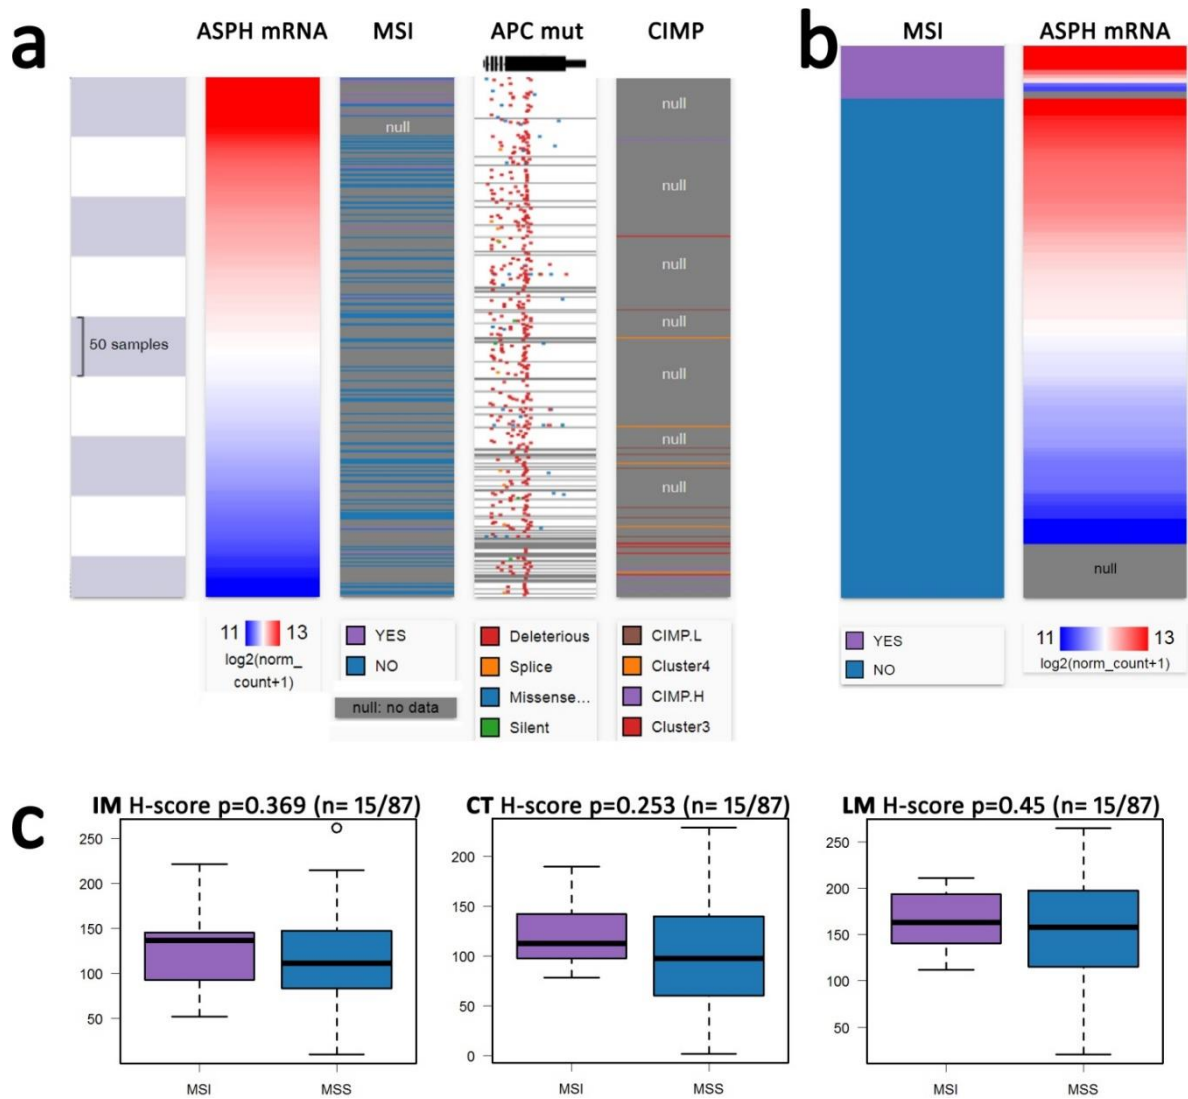

**Figure S8.** Analysis of ASPH levels in CRC samples with microsatellite instability (MSI): (a) analysis of ASPH mRNA levels in 434 TCGA-COAD CRC samples compared to MSI, APC mutation (surrogate marker for chromosomal instability, CIN) and CIMP (CpG island methylator phenotype); (b) A close-up of 133 samples with MSS/MSI available data (ASPH mRNA levels were available for 11 MSI samples); (c) Comparison of ASPH protein levels (H-Scores) in the IM, CT and LM of our samples using available data on microsatellite status (15 MSI, 72 MSS, excluded 13 not classified). The analyses shown in panels a and b were obtained using Xena functional genomics explorer (<https://xenabrowser.net>).

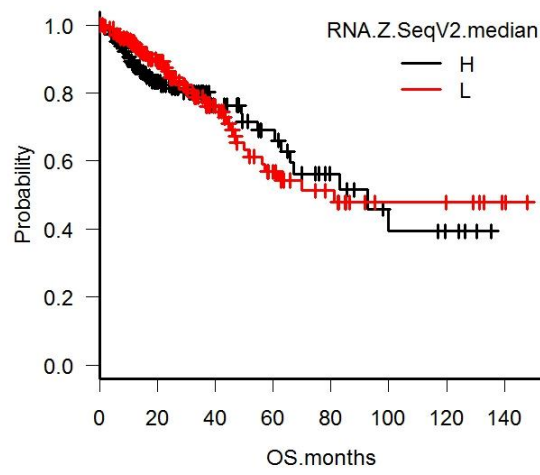

**Figure S9.** Kaplan-Meier analysis of overall survival in TCGA-COAD patients according to low or high ASPH mRNA levels (the median of data was used as cut-off threshold).  $p = 0.735$ .



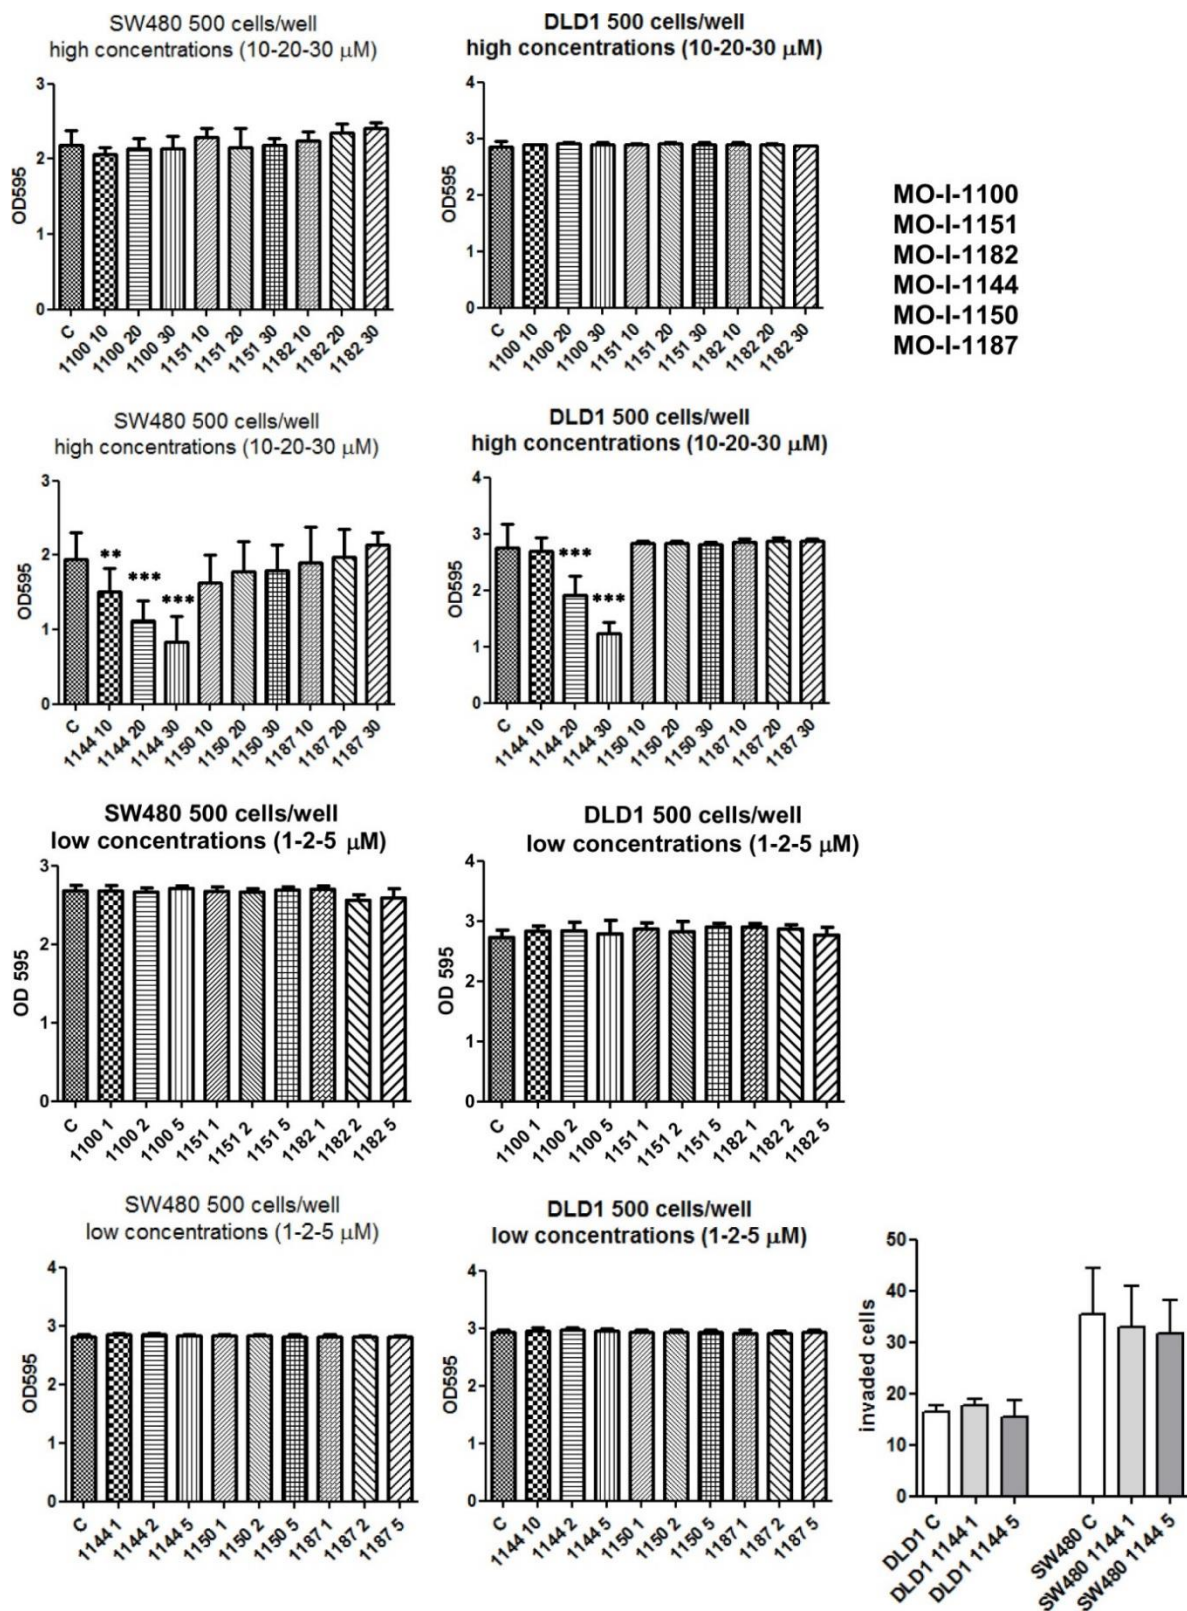

**Figure S10.** Screening of SMIs on ASPH catalytic activity in CRC cell lines SW480 and DLD1. A panel of ASPH inhibitors was screened to select active compounds and optimize concentrations for further analysis. Graphed data compare the effects of MO-I-1100, MO-I-1151, MO-I-1182, MO-I-1144, MO-I-1150 and MO-I-1187 at concentrations ranging from 1 to 30 $\mu\text{M}$ . Dose-effects of the SMIs on cell viability were measured relative to vehicle-treated control cells using the crystal violet or the invasion test. MO-I-1144 compound resulted the only effective although at high concentrations.

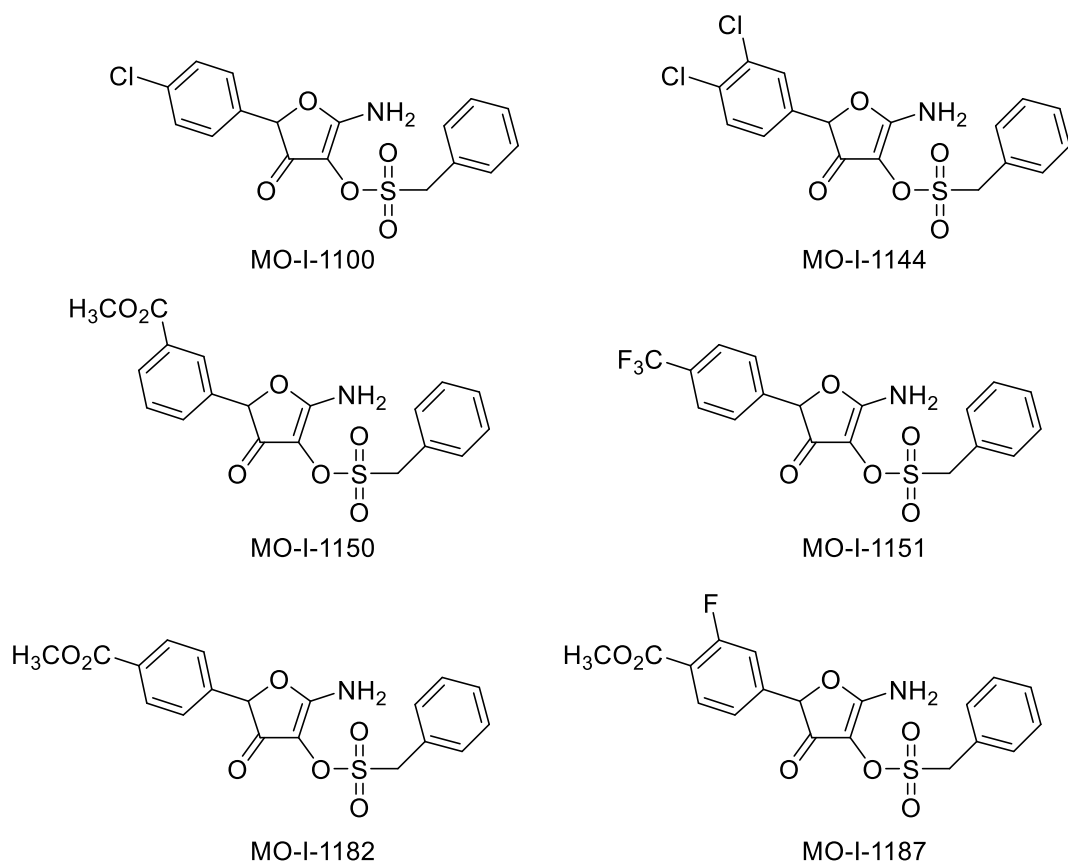

Figure S11: Structures of ASPH SMIs.

**Table S1:** Evaluation of Immune, NOTCH and Invasive mRNA signatures, according to ASPH levels, in COAD (Firehouse legacy) TCGA samples. Pearson's correlation  $r$  indexes with significant  $p$  values are color-graded according to the following scale: red  $r > 0.2$ , orange  $0 < r < 0.2$ , green  $-0.2 < r < 0$ , blue  $r < -0.2$ . Significant  $Q$  values are reported in bold.

#### Immune signature

| ASPH vs           | Pearson $r$  | 95% CI         | $p$             | $Q$             |
|-------------------|--------------|----------------|-----------------|-----------------|
| CD3G              | 0.0509       | -0.0814 0.181  | 0.451           | 0.414           |
| CD8B              | -0.108       | -0.236 0.0242  | 0.109           | 0.157           |
| CD4               | -0.0321      | -0.163 0.100   | 0.634           | 0.524           |
| PTPRC-CD45        | 0.0802       | -0.052 0.210   | 0.234           | 0.265           |
| CD68              | 0.034        | -0.0981 0.165  | 0.614           | 0.515           |
| <b>NCR1-NKp44</b> | <b>0.178</b> | 0.0474 0.303   | <b>0.00786</b>  | <b>0.034</b>    |
| NCR2-NKp46        | -0.120       | -0.248 0.0115  | 0.0735          | 0.114           |
| CTLA4             | 0.127        | -0.00477 0.254 | 0.0589          | 0.106           |
| <b>PDCD1-PD1</b>  | <b>0.141</b> | 0.00945 0.268  | <b>0.0358</b>   | 0.083           |
| <b>CD274-PDL1</b> | <b>0.307</b> | 0.183 0.422    | <b>3.16e-06</b> | <b>9.14e-05</b> |

#### Notch signature

| ASPH vs      | Pearson $r$  | 95% CI        | $p$         | $Q$   |
|--------------|--------------|---------------|-------------|-------|
| ADAM10       | 0.123        | -0.0148 0.257 | 0.08        | 0.121 |
| ADAM17       | 0.075        | -0.0634 0.21  | 0.288       | 0.297 |
| <b>APH1A</b> | <b>0.152</b> | 0.015 0.284   | <b>0.03</b> | 0.082 |
| APH1B        | -0.0962      | -0.231 0.0421 | 0.172       | 0.216 |
| ARRDC1       | 0.021        | -0.117 0.158  | 0.767       | 0.573 |
| CTBP1        | 0.0986       | -0.0397 0.233 | 0.162       | 0.213 |
| CTBP2        | -0.045       | -0.182 0.0933 | 0.524       | 0.466 |



|               |               |           |          |                 |                 |
|---------------|---------------|-----------|----------|-----------------|-----------------|
| CUL1          | 0.0157        | -0.122    | 0.153    | 0.824           | 0.574           |
| DLL1          | -0.043        | -0.18     | 0.0953   | 0.543           | 0.469           |
| DLL3          | -0.108        | -0.242    | 0.0299   | 0.124           | 0.175           |
| DLL4          | -0.0192       | -0.156    | 0.119    | 0.786           | 0.574           |
| DTX1          | 0.0116        | -0.126    | 0.149    | 0.87            | 0.592           |
| DTX2          | -0.0863       | -0.221    | 0.0521   | 0.221           | 0.259           |
| <b>DTX3</b>   | <b>-0.169</b> | -0.299    | -0.0316  | <b>0.0162</b>   | 0.054           |
| <b>DTX3L</b>  | <b>0.142</b>  | 0.00451   | 0.274    | <b>0.0431</b>   | 0.089           |
| DTX4          | 0.00238       | -0.135    | 0.14     | 0.973           | 0.625           |
| EP300         | -0.105        | -0.239    | 0.0333   | 0.137           | 0.188           |
| FBXW7         | -0.0396       | -0.176    | 0.0987   | 0.575           | 0.489           |
| HDAC1         | 0.0162        | -0.122    | 0.154    | 0.818           | 0.574           |
| <b>HDAC2</b>  | <b>-0.147</b> | -0.279    | -0.00914 | <b>0.0368</b>   | 0.083           |
| HES1          | -0.0969       | -0.231    | 0.0414   | 0.169           | 0.216           |
| HEYL          | -0.126        | -0.259    | 0.0117   | 0.0727          | 0.114           |
| <b>ITCH</b>   | <b>-0.181</b> | -0.311    | -0.0446  | <b>0.00966</b>  | <b>0.039</b>    |
| JAG1          | 0.0438        | -0.0945   | 0.18     | 0.535           | 0.469           |
| JAG2          | 0.0813        | -0.057    | 0.217    | 0.249           | 0.277           |
| <b>LFNG</b>   | <b>-0.304</b> | -0.424    | -0.173   | <b>1.06e-05</b> | <b>0.0002</b>   |
| MAML1         | 0.0298        | -0.108    | 0.167    | 0.673           | 0.540           |
| MAML2         | 0.129         | -0.00844  | 0.262    | 0.0657          | 0.108           |
| MAML3         | 0.0662        | -0.0722   | 0.202    | 0.348           | 0.341           |
| MFNG          | 0.055         | -0.0834   | 0.191    | 0.436           | 0.406           |
| NCOR2         | 0.0286        | -0.11     | 0.166    | 0.686           | 0.543           |
| <b>NCSTN</b>  | <b>-0.146</b> | -0.278    | -0.00868 | <b>0.0374</b>   | 0.083           |
| NOTCH1        | -0.0925       | -0.227    | 0.0458   | 0.19            | 0.230           |
| <b>NOTCH2</b> | <b>0.167</b>  | 0.0302    | 0.298    | <b>0.0171</b>   | 0.054           |
| NOTCH3        | -0.0677       | -0.203    | 0.0707   | 0.337           | 0.339           |
| NOTCH4        | -0.0041       | -0.142    | 0.134    | 0.954           | 0.620           |
| <b>NUMB</b>   | <b>0.240</b>  | 0.106     | 0.366    | <b>0.000565</b> | <b>0.005</b>    |
| NUMBL         | 0.122         | -0.0158   | 0.256    | 0.0825          | 0.122           |
| <b>PSEN1</b>  | <b>0.214</b>  | 0.0789    | 0.342    | <b>0.00214</b>  | <b>0.015</b>    |
| PSEN2         | -0.129        | -0.262    | 0.00844  | 0.0657          | 0.108           |
| PSENE1        | 0.0237        | -0.114    | 0.161    | 0.737           | 0.573           |
| <b>RBPJ</b>   | <b>0.269</b>  | 0.137     | 0.392    | <b>0.000102</b> | <b>0.001</b>    |
| <b>RBPJL</b>  | <b>-0.169</b> | -0.3      | -0.0323  | <b>0.0158</b>   | 0.054           |
| <b>RFNG</b>   | <b>0.179</b>  | 0.0418    | 0.309    | <b>0.0108</b>   | <b>0.041</b>    |
| <b>SNW1</b>   | <b>0.330</b>  | 0.201     | 0.447    | <b>1.53e-06</b> | <b>8.85e-05</b> |
| SPEN          | 0.130         | -0.00833  | 0.263    | 0.065           | 0.108           |
| HES2          | -0.00536      | -0.143    | 0.132    | 0.94            | 0.618           |
| HES4          | 0.137         | -0.000606 | 0.27     | 0.0511          | 0.098           |
| HES7          | 0.0067        | -0.131    | 0.144    | 0.924           | 0.614           |
| HEY1          | -0.012        | -0.149    | 0.126    | 0.865           | 0.592           |
| HEY2          | -0.0798       | -0.215    | 0.0585   | 0.257           | 0.277           |

#### Invasive signature

| ASPH vs      | Pearson r     | 95% CI         | p              | Q            |
|--------------|---------------|----------------|----------------|--------------|
| <b>MMP1</b>  | <b>0.190</b>  | 0.0539 0.32    | <b>0.00656</b> | <b>0.031</b> |
| MMP2         | 0.0549        | -0.0834 0.191  | 0.436          | 0.406        |
| <b>MMP3</b>  | <b>0.150</b>  | 0.0122 0.282   | <b>0.0331</b>  | 0.083        |
| MMP7         | 0.0617        | -0.0766 0.198  | 0.382          | 0.368        |
| MMP9         | 0.0203        | -0.118 0.158   | 0.773          | 0.573        |
| MMP10        | -0.0168       | -0.154 0.121   | 0.81           | 0.574        |
| <b>MMP11</b> | <b>-0.229</b> | -0.355 -0.0939 | <b>0.00103</b> | <b>0.008</b> |
| MMP12        | 0.0922        | -0.0461 0.227  | 0.191          | 0.230        |
| <b>MMP13</b> | <b>0.162</b>  | 0.0248 0.293   | <b>0.0209</b>  | 0.061        |
| <b>MMP14</b> | <b>0.208</b>  | 0.0719 0.336   | <b>0.00296</b> | <b>0.015</b> |

|               |               |          |         |                 |               |
|---------------|---------------|----------|---------|-----------------|---------------|
| MMP15         | -0.0486       | -0.185   | 0.0898  | 0.492           | 0.444         |
| MMP16         | -0.000744     | -0.138   | 0.137   | 0.992           | 0.630         |
| MMP17         | -0.0216       | -0.159   | 0.116   | 0.759           | 0.573         |
| MMP19         | -0.0315       | -0.168   | 0.107   | 0.656           | 0.534         |
| MMP21         | -0.0772       | -0.213   | 0.0611  | 0.273           | 0.287         |
| <b>MMP23B</b> | <b>-0.162</b> | -0.293   | -0.0247 | <b>0.0211</b>   | 0.061         |
| <b>MMP24</b>  | <b>-0.149</b> | -0.281   | -0.0115 | <b>0.0339</b>   | 0.083         |
| MMP25         | 0.0992        | -0.0391  | 0.234   | 0.159           | 0.213         |
| MMP26         | -0.0857       | -0.221   | 0.0527  | 0.224           | 0.259         |
| MMP27         | 0.010         | -0.128   | 0.148   | 0.887           | 0.596         |
| MMP28         | 0.134         | -0.00366 | 0.267   | 0.0564          | 0.105         |
| ITGB3         | 0.0673        | -0.0711  | 0.203   | 0.34            | 0.339         |
| ITGAV         | 0.144         | 0.00673  | 0.277   | 0.04            | 0.085         |
| <b>PTK2</b>   | <b>0.291</b>  | 0.16     | 0.413   | <b>2.45e-05</b> | <b>0.0003</b> |
| <b>CDH1</b>   | <b>-0.212</b> | -0.34    | -0.0762 | <b>0.00243</b>  | <b>0.015</b>  |
| CDH2          | -0.0215       | -0.153   | 0.11    | 0.75            | 0.573         |
| SPARC         | 0.0174        | -0.121   | 0.155   | 0.805           | 0.574         |
| WFDC2         | -0.0796       | -0.215   | 0.0588  | 0.259           | 0.277         |
| <b>TIMP1</b>  | <b>0.138</b>  | 0.000221 | 0.27    | <b>0.0497</b>   | 0.098         |
| <b>TIMP2</b>  | <b>0.209</b>  | 0.0732   | 0.337   | <b>0.00279</b>  | <b>0.015</b>  |

**Table S2.** ASPH silencing in combination therapy. In preliminary experiments the IC<sub>50</sub> (half maximal inhibitory concentration) of both 5FU and Oxaliplatin, and their combination index (CI) were calculated as described (Chou TC. Theoretical basis, experimental design, and computerized simulation of synergism and antagonism in drug combination studies. Pharmacol Rev 2006; 68: 621–81). Fast forward ASPH and CTR silencing was then carried out and cells immediately plated at 3,000/well and allowed to attach. The day after, the cells were treated and the treatment lasted 96h. CI was calculated on siCTR and siASPH cells. The CI indicates a synergic effect in both ASPH silenced cell lines.

| Cell line    | 5-Fluorouracil + Oxaliplatin IC <sub>50</sub> (μM) | CI   | Effect   |
|--------------|----------------------------------------------------|------|----------|
| SW480        | 8.43                                               | 0.90 |          |
| SW480 siASPH | 1.77                                               | 0.47 | SYNERGIC |
| DLD1         | 5.18                                               | 1.71 |          |
| DLD1 siASPH  | 2.93                                               | 0.57 | SYNERGIC |

**Table S3.** Patients list.

| Age | Sex | Localization | UICC stage | Dukes' stage | T  | N  | M  | G |
|-----|-----|--------------|------------|--------------|----|----|----|---|
| 70  | F   | DX           | II         | B2           | 3  |    |    | 2 |
| 69  | F   | SG           | II         | B2           | 3  |    |    | 2 |
| 78  | M   | RT           | III        | C2           | 3  | 1b |    | 3 |
| 65  | F   | RT           | I          | B1           | 2  |    |    | 1 |
| 70  | F   | RT           | II         | B2           | 3  |    |    | 2 |
| 70  | M   | SX           | II         | B2           | 3  |    |    | 2 |
| 71  | F   | DX           | I          | B1           | 2  |    |    | 2 |
| 75  | M   | SG           | I          | A            | 1  |    |    | 2 |
| 54  | F   | SG           | III        | C2           | 3  | 1b |    | 2 |
| 84  | M   | DX           | III        | C2           | 3  | 1b |    | 3 |
| 79  | M   | RT           | I          | B1           | 2  |    |    | 2 |
| 49  | F   | RT           | IV         | D            | 3  |    | 1° | 2 |
| 76  | F   | DX           | III        | C2           | 4° | 1b |    | 2 |
| 59  | M   | DX           | IV         | D            | 3  |    | 1° | 2 |
| 84  | F   | DX           | III        | C2           | 3  | 1° |    | 2 |
| 70  | M   | SG           | II         | B2           | 3  |    |    | 2 |
| 65  | F   | DX           | III        | C1           | 2  | 1b |    | 3 |
| 82  | F   | RT           | III        | C2           | 3  | 2b |    | 2 |
| 79  | M   | DX           | III        | C2           | 4b | 2° |    | 2 |
| 80  | F   | SX           | II         | B2           | 3  |    |    | 2 |



|    |   |    |     |    |    |    |    |   |
|----|---|----|-----|----|----|----|----|---|
| 72 | M | DX | II  | B2 | 3  |    |    | 2 |
| 92 | F | DX | III | C3 | 3  | 1° |    | 2 |
| 69 | M | SX | IV  | D  | 4° | 1b | 1° | 2 |
| 78 | M | DX | I   | B1 | 2  |    |    | 2 |
| 68 | F | SG | II  | B2 | 3  |    |    | 2 |
| 79 | M | SG | III | C2 | 3  | 1° |    | 2 |
| 80 | M | SG | III | C2 | 4° | 2b |    | 3 |
| 70 | F | DX | II  | B2 | 3  |    |    | 2 |
| 92 | M | DX | II  | B2 | 4° |    |    | 2 |
| 73 | M | SX | III | C2 | 3  | 1° |    | 2 |
| 68 | F | DX | II  | B2 | 3  |    |    | 2 |
| 71 | F | SX | III | C2 | 3  | 1° |    | 2 |
| 72 | M | DX | II  | B2 | 3  |    |    | 3 |
| 78 | F | RT | I   | B1 | 2  |    |    | 1 |
| 58 | F | SX | III | C2 | 3  | 1° |    | 1 |
| 78 | F | RT | II  | B3 | 4b |    |    | 2 |
| 74 | M | RT | IV  | D  | 3  |    | 1° | 2 |
| 63 | F | RT | I   | B1 | 2  |    |    | 2 |
| 54 | M | DX | III | C2 | 3  | 1b |    | 3 |
| 80 | F | SG | III | C2 | 4° | 2° |    | 2 |
| 88 | M | DX | III | C2 | 3  | 1° |    | 2 |
| 64 | F | RT | II  | B2 | 3  |    |    | 2 |
| 42 | M | SG | IV  | D  | 4° | 2° | 1° | 2 |
| 75 | M | DX | IV  | D  | 3  | 2b | 1b | 2 |
| 75 | F | SG | II  | B2 | 3  |    |    | 3 |
| 68 | F | DX | II  | B2 | 3  |    |    | 2 |
| 83 | M | DX | I   | B1 | 2  |    |    | 2 |
| 59 | M | SX | III | C2 | 3  | 1° |    | 2 |
| 84 | F | DX | III | C2 | 4° | 1b |    | 2 |
| 74 | M | SG | III | C2 | 3  | 2° |    | 2 |
| 65 | F | SG | I   | B1 | 2  |    |    | 2 |
| 68 | M | DX | III | C2 | 3  | 2° |    | 2 |
| 52 | F | RT | IV  | D  | 4° | 2° | 1° | 2 |
| 59 | F | DX | II  | B2 | 4° |    |    | 2 |
| 66 | M | DX | IV  | D  | 4° | 1b | 1° | 2 |
| 76 | M | SG | I   | B1 | 2  |    |    | 2 |
| 72 | M | SX | II  | B2 | 3  |    |    | 1 |
| 55 | M | SG | III | C2 | 3  | 1° |    | 3 |
| 81 | M | SX | III | C2 | 3  | 1° |    | 2 |
| 72 | M | SX | III | C2 | 3  | 1° |    | 2 |
| 60 | M | RT | I   | B1 | 2  |    |    | 2 |
| 85 | F | DX | II  | B2 | 3  |    |    | 2 |
| 80 | F | DX | I   | B1 | 2  |    |    | 3 |
| 78 | F | DX | I   | B1 | 2  |    |    | 2 |
| 42 | F | RT | III | C1 | 2  | 1b |    | 2 |
| 71 | F | DX | II  | B2 | 3  |    |    | 2 |
| 84 | F | DX | II  | B2 | 3  |    |    | 2 |
| 46 | F | SX | III | C2 | 4b | 2° |    | 3 |
| 65 | M | SX | IV  | D  | 4° | 1b | 1° | 2 |
| 63 | M | RT | III | C2 | 3  | 1b |    | 2 |
| 59 | M | RT | II  | B2 | 3  |    |    | 2 |
| 73 | F | DX | II  | B2 | 3  |    |    | 2 |
| 52 | M | SG | II  | B2 | 3  |    |    | 3 |
| 81 | F | RT | III | C2 | 3  | 1b |    | 2 |
| 64 | M | SX | IV  | D  | 3  |    | 1° | 2 |
| 85 | M | RT | II  | B2 | 3  |    |    | 1 |
| 59 | F | DX | III | C1 | 2  | 1° |    | 2 |
| 90 | M | DX | III | C2 | 3  | 2b |    | 2 |
| 54 | F | TR | II  | B2 | 3  |    |    | 2 |

|    |   |    |     |    |    |    |    |   |
|----|---|----|-----|----|----|----|----|---|
| 81 | M | DX | II  | B2 | 4° |    | 2  |   |
| 59 | M | SX | I   | B1 | 2  |    | 2  |   |
| 68 | M | RT | II  | B2 | 4b |    | 2  |   |
| 78 | M | SG | II  | B2 | 4° |    | 2  |   |
| 75 | F | DX | II  | B2 | 3  |    | 1  |   |
| 41 | F | DX | III | C2 | 3  | 2b | 3  |   |
| 73 | M | DX | III | C2 | 3  | 2b | 3  |   |
| 82 | F | SX | III | C2 | 3  | 1b | 2  |   |
| 57 | F | SX | III | C2 | 3  | 1° | 2  |   |
| 80 | M | SG | IV  | D  | 4° | 2b | 1° | 3 |
| 75 | M | SG | II  | B2 | 3  |    | 2  |   |
| 82 | F | DX | III | C2 | 3  | 2b | 3  |   |
| 61 | F | TR | III | C2 | 3  | 1° | 2  |   |
| 67 | F | SG | IV  | D  | 3  | 1b | 1° | 3 |
| 54 | F | SX | II  | B2 | 3  |    | 3  |   |
| 63 | M | DX | III | C2 | 3  | 1° | 3  |   |
| 79 | M | DX | III | C2 | 4° | 2b | 3  |   |
| 86 | F | DX | II  | B2 | 3  |    | 2  |   |
| 55 | M | RT | IV  | D  | 4° | 2b | 1° | 2 |
| 69 | F | DX | III | C2 | 3  | 1° | 2  |   |
| 92 | F | RT | II  | B2 | 3  |    | 2  |   |

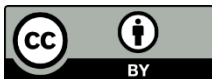

© 2020 by the authors. Licensee MDPI, Basel, Switzerland. This article is an open access article distributed under the terms and conditions of the Creative Commons Attribution (CC BY) license (<http://creativecommons.org/licenses/by/4.0/>).
